# Supplementary material for: Label-free quantification of antibody–oligonucleotide conjugates with varying stoichiometries using capillary zone electrophoresis
Source: Royal Society of Chemistry journal article supplement (doi:10.1039/d5an00214a), 2025-01-01
Supplement: d5an00214a1.pdf [file d5an00214a1.pdf]

## Supplementary Information

### Label-free quantification of antibody-oligonucleotide conjugates with varying stoichiometries using capillary zone electrophoresis

Mo Zhou, †<sup>a</sup> Xiaoxia Zhang, †<sup>d</sup> Qinglin Xia, <sup>a</sup> Dongke Liu, <sup>d</sup> Hongxu Chen, <sup>d</sup> Yanli Wen, <sup>e</sup> Lele Wang, <sup>e</sup> Linjie Guo, <sup>\*b</sup> Jiang Li, <sup>b</sup> and Lihua Wang<sup>\*b</sup>

<sup>a.</sup> CAS Key Laboratory of Interfacial Physics and Technology, Shanghai Institute of Applied Physics, Chinese Academy of Sciences, Shanghai 201800; University of Chinese Academy of Sciences, Beijing 100049, China.

<sup>b.</sup> Institute of Materiobiology, College of Sciences, Shanghai University, Shanghai 200444, China.

<sup>c.</sup> Key Laboratory of Bioanalysis and Metrology, State Administration for Market Regulation, Shanghai Institute of Measurement and Testing Technology, Shanghai 201203, China.

<sup>d.</sup> SCIEX, Shanghai, 201100, China

† These authors contributed equally to this work.

\* Corresponding authors

E-mail: wanglihua@shu.edu.cn

guolinjie@shu.edu.cn

## Experiment

**Materials.** Rituximab (RTX) is provided by Shanghai Renji Hospital. Oligonucleotides modified with HS-SH C6, DBCO, and biotin were purchased from Sangon Biotech (China) with sequence (GTGGTAGTTAGGAGTGAATGC). Borate, HP- $\beta$ -CD, and SDS were purchased from Sinopharm Chemical Reagent Co., Ltd..

### Construction of Antibody-Oligonucleotide Conjugates

**Covalent Conjugation 1.** RTX was subjected to desalting using a 100 kDa protein concentrator (PES membrane, Thermo Scientific™) through centrifugal filtration. The buffer was subsequently exchanged with phosphate-buffered saline (PBS, pH 7.4). A 10 mM solution of Sulfo-SMCC (Thermo Scientific™) was prepared and added to RTX (10 mg/mL) at a molar ratio of 10:1 (Sulfo-SMCC: rituximab). The reaction was carried out at 4°C for 2 hours, followed by the removal of unreacted small molecules using a Zeba desalting column (Thermo Fisher Scientific). The thiol-modified oligonucleotide was then conjugated to the RTX at a molar ratio of 3:1 (oligonucleotide: RTX) and incubated overnight at 4°C.

**Covalent Conjugation 2.** Azide groups were modified on RTX using the SiteClick™ Antibody Azide Modification Kit (Thermo Scientific™) according to the manufacturer's instructions. The N<sub>3</sub>-modified RTX was then conjugated to DBCO-oligonucleotide at a molar ratio of 1:3 (oligonucleotide: RTX) and incubated overnight at 25°C.

**Non-covalent Conjugation.** RTX was biotinylated using the EZ-Link™ Sulfo-NHS-SS-Biotin kit (Thermo Scientific™) according to the manufacturer's instructions. The biotinylated RTX was subsequently mixed with NeutrAvidin (Thermo Scientific™) at a 1:1 molar ratio and incubated at room temperature for 1 hour. Following this, biotin-modified oligonucleotides were added to the RTX-NeutrAvidin conjugate at a molar ratio of 1:4 (oligonucleotide:antibody-NeutrAvidin) and incubated at room temperature for an additional hour.

### SDS-polyacrylamide gel electrophoresis (SDS-PAGE) characterization of AOCs

SDS-PAGE was performed for AOC separation using a 10% resolving gel (pH 8.8) and a 5% stacking gel (pH 6.8). Electrophoresis was run at 90 V until the samples entered the resolving gel, then at 120-150 V until the bromophenol blue front reached the bottom. Gels were stained with Coomassie Brilliant Blue for 1 h and destained until bands were visible.

### SDS-capillary gel electrophoresis (SDS-CGE) characterization of AOCs

SDS-CEG was performed on SCIEX PA 800 Plus Pharmaceutical Analysis System equipped with a UV detector and a fused-silica capillary (inner diameter: 50  $\mu\text{m}$ , effective length: 20 cm total length: 30.2 cm). The capillary was coated with a polyacrylamide gel to enhance separation efficiency and stability. The running buffer consisted of a phosphate buffer (pH 8.8, 20 mM) containing 0.1% (w/v) polyacrylamide gel. Before injection, samples were diluted to a concentration of 10 mg/ml. The capillary was conditioned by flushing with 0.1 M NaOH for 5 minutes, followed by the running buffer for 10 minutes before each run. Electrophoresis was conducted at 25°C with an applied voltage of 15 kV. The injection time was set to 20 seconds at 5 kV.

#### **Capillary zone electrophoresis (CZE) characterization of AOCs**

CZE was performed using the SCIEX PA 800 Plus Pharmaceutical Analysis System. Analytes, including AOCs, RTX, and ODN, were each prepared at a concentration of 1 mg/mL in deionized water. Deionized water was also used as a blank control to ensure the absence of interfering signals. The electrophoresis conditions were optimized as follows: a diode array detector (DAD) was employed with full-wavelength scanning to monitor analyte migration. Separations were conducted using a fused silica capillary (50  $\mu\text{m}$  inner diameter, 50 cm effective length, 60.2 cm total length). Sample injection was performed at 0.5 psi for 5 seconds, followed by the injection of separation buffer at 1 psi for 5 seconds. The separation voltage was set to 10 kV, and the total run time was 40 minutes. The capillary temperature was maintained at 25 °C, while the sample compartment was kept at 15 °C. The separation buffer was prepared by mixing 2.5 mL of 200 mM borate, 2.5 mL of 100 mM HP- $\beta$ -CD, and 1 mL of 100 mM SDS, and then diluted with water to a final volume of 10 mL. Data acquisition was performed at a sampling rate of 2-4 Hz with a slit width of 100  $\times$  200  $\mu\text{m}$ .

#### **High-performance liquid chromatography-mass spectrometry (HPLC-MS) characterization of AOCs**

SCIEX X500B QTOF system was used for TOF-MS scanning. Chromatography and mass spectrometry conditions are as follows:

##### **Chromatography**

Phase A: 2% acetonitrile in water (0.1% formic acid)

Phase B: 98% acetonitrile in water (0.1% formic acid)

Column: Waters BEH200 SEC, 150  $\times$  4.6 mm, 1.7  $\mu\text{m}$ .

Elution Mode: Isocratic elution with 35% Phase B.

Flow Rate: 0.22 mL/min.

Column Temperature: 40 °C.

### Mass Spectrometry

| Parameters                 | Value |
|----------------------------|-------|
| Curtain gas (psi):         | 35    |
| Collision Gas(psi):        | 7     |
| IonSpray Voltage(V):       | 5000  |
| Temperature(°C):           | 450   |
| Declustering Potential(V): | 275   |
| Ion Source Gas1(psi):      | 45    |
| Ion Source Gas2(psi):      | 45    |
| TOF start mass (m/z):      | 600   |
| TOF stop mass (m/z):       | 5000  |
| Accumulation time (s):     | 1     |

**Table S1** Mass Spectrometry Parameters

## Supplementary Figures

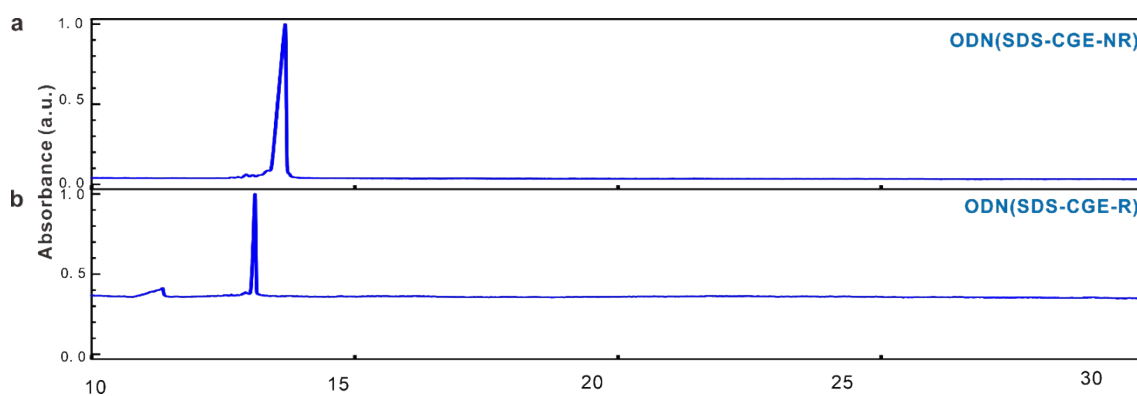

**Fig. S1** Non-reducing (a) and reducing (b) SDS-CGE electropherogram of ODN.

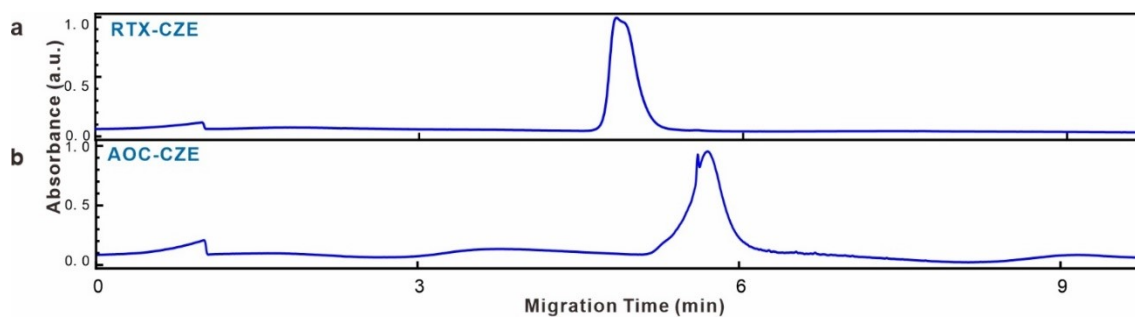

**Fig.S2** CZE electropherograms of RTX (a) and AOC (b) in buffer at pH 3.

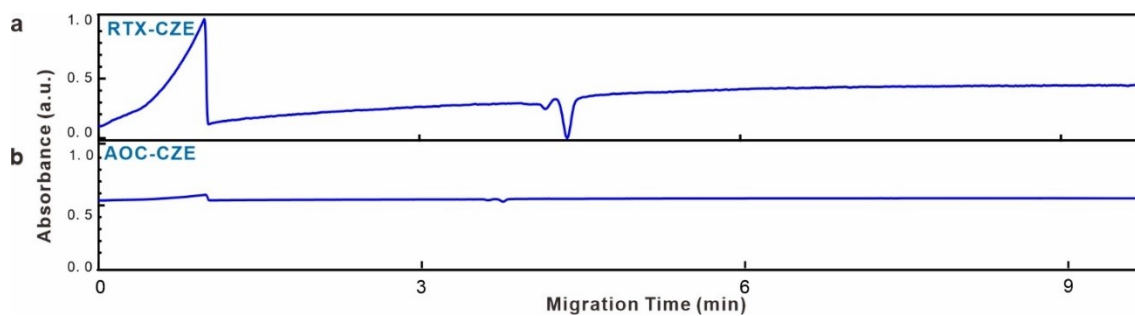

**Fig.S3** CZE electropherograms of RTX (a) and AOC (b) in buffer at pH 5.5.

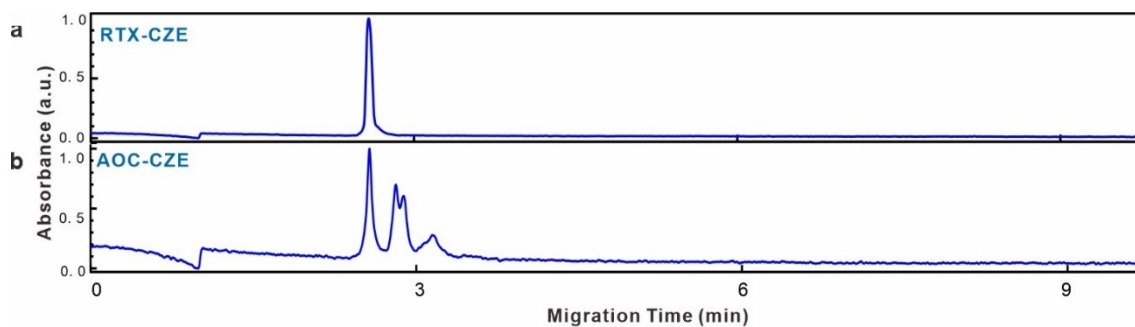

**Fig.S4** CZE electropherograms of RTX (a) and AOC (b) in buffer at pH 7.5.

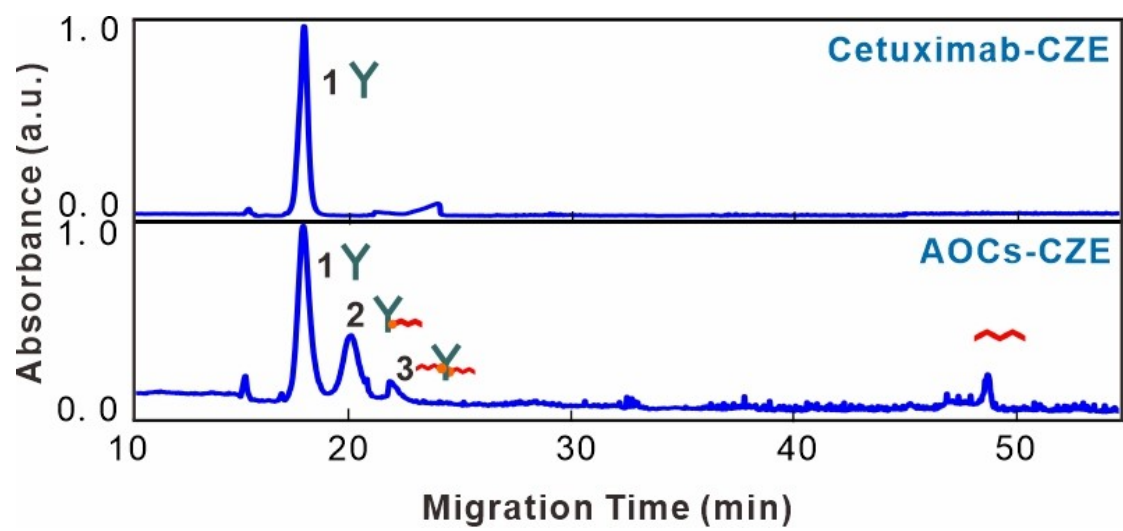

**Fig.S5** CZE electropherograms of Cetuximab and its corresponding AOCs.
